# Supplementary material
Source: PubMed Central journal article supplement (PMC5373861)
Supplement: jci-127-90193-s001.pdf [file jci-127-90193-s001.pdf]

## **Loss of *DDRGK1* Causes Shohat Type SEMD by increasing SOX9 Ubiquitination**

Adetutu T. Egunsola<sup>1</sup>, Yangjin Bae<sup>1\*</sup>, Ming-Ming Jiang<sup>1</sup>, David S. Liu<sup>1</sup>, Yuqing Chen-Evenson<sup>1</sup>, Terry Bertin<sup>1</sup>, Shan Chen<sup>1</sup>, James T. Lu<sup>2,3</sup>, Lisette Nevarez<sup>4</sup>, Nurit Magal<sup>5</sup>, Annick Raas-Rothschild<sup>6</sup>, Eric C. Swindell<sup>7</sup>, Daniel H. Cohn<sup>4,8,9</sup>, Richard A. Gibbs<sup>1,2</sup>, Philippe M. Campeau<sup>10</sup>, Mordechai Shohat<sup>11</sup>, Brendan H. Lee<sup>1\*</sup>

<sup>1</sup>Department of Molecular and Human Genetics at Baylor College of Medicine, Houston, TX,

<sup>2</sup>Human Genome Sequencing Center at Baylor College of Medicine, Houston, <sup>3</sup>Department of Structural and Computational Biology & Molecular Biophysics at Baylor College of Medicine, Houston, TX, <sup>4</sup>Department of Molecular Cell and Developmental Biology at University of California, Los Angeles, Los Angeles, CA, <sup>5</sup>Recanati Institute of Medical Genetic at Rabin Medical center, Petach Tikva, Israel, <sup>6</sup>Institute for Rare Diseases at Sheba-Tel Hashomer Medical Center, Ramat Gan, Israel, <sup>7</sup>The University of Texas Graduate School of Biomedical Sciences, Houston, TX, <sup>8</sup>Department of Orthopaedic Surgery at University of California, Los Angeles, Los Angeles, CA, <sup>9</sup>International Skeletal Dysplasia Registry at University of California, Los Angeles, Los Angeles, CA, <sup>10</sup>Department of Pediatrics at University of Montreal, Montreal, QC, Canada <sup>11</sup>Maccabi Genetic institute and Bioinformatics unit - Sheba Cancer Research Center, Sackler School of medicine at Tel Aviv University, Tel Aviv, Israel.

\*Correspondence should be addressed to B.H.L. (blee@bcm.edu) or Y.B. (bae@bcm.edu)

### **SUPPLEMENTARY INFORMATION**

Tables S1 and S2

Figures S1-S3

**Table S1. *Ddrgk1*<sup>-/-</sup> mice are embryonic lethal between E11.5 and E12.5.**

| <b>Time</b> | <b><i>Ddrgk1</i><sup>+/+</sup></b> | <b><i>Ddrgk1</i><sup>+/-</sup></b> | <b><i>Ddrgk1</i><sup>-/-</sup></b> | <b>Total</b> |
|-------------|------------------------------------|------------------------------------|------------------------------------|--------------|
| 3 weeks     | 17 (34%)                           | 33 (66%)                           | 0                                  | 50           |
| E14.5       | 6 (42.9%)                          | 8 (57.1%)                          | 0 (0%)                             | 14           |
| E13.5       | 3 (50%)                            | 3 (50%)                            | 0 (0%)                             | 6            |
| E12.5       | 21 (32.3%)                         | 37 (56.9%)                         | 7 (10.8%)                          | 65           |
| E11.5       | 11 (25%)                           | 20 (45.5%)                         | 13 (29.5%)                         | 44           |

**Table S2. Primer list.**

| <b>Primer</b>     | <b>Sequence</b>                       |
|-------------------|---------------------------------------|
| sox9a_pCS2 F      | TCTTTTTGCAGGATCCCGTCCATCTACGGTGTTCG   |
| sox9a_pCS2 R      | TCACTATAGTTCTAGATCAGTGCACATTCAGACGT   |
| ddrgk1_pCS2 F     | TCTTTTTGCAGGATCCCCAAACTGTACCTGCAGCAGG |
| ddrgk1_pCS2 R     | TCACTATAGTTCTAGATGTAGGTCATGCGCTGCT    |
| Ddrgk1 sgRNA F    | CACCGCCAGCGCGCCTGCGGG ATC             |
| Ddrgk1 sgRNA R    | AAACGATCCCGCAGGCGCGCTGGC              |
| T7_Ddrgk1 sgRNA F | TTAATACGACTCACTATAGGGCCAGCGCGCCTGCGGG |
| T7_Ddrgk1 sgRNA R | AAAAGCACCGACTCGGTGCC                  |

## SUPPLEMENTAL FIGURE LEGENDS

**Figure S1. Shohat type SEMD patient LCLs express a mixture of two aberrant *DDRGK1* RNA species that both result in a premature stop codon.** (A, B) Chromatograms of *DDRGK1* cDNA and schematic of wildtype and mutant RNA species from (A) control and (B) patient LCLs. Patient LCLs show aberrant splicing at intron 3 and a mixture of two mutant RNA species because of the c.408+1G>A mutation. The first mutant RNA species found in patient LCLs is a readthrough of intron 3, while the second mutant RNA species is the result of activation and use of a cryptic splice donor site. Both RNA species have a premature stop codon.

**Figure S2. Generation of *Ddrgk1*<sup>-/-</sup> mice by CRISPR/Cas9 gene editing.** (A) Schematic of the *Ddrgk1*<sup>2BL</sup> allele showing the 310 bp c.-249\_61del mutation deleting a portion of the 5'UTR and the first exon of the *Ddrgk1* gene. (B) Chromatogram of an E11.5 *Ddrgk1*<sup>2BL/2BL</sup> (*Ddrgk1*<sup>-/-</sup>) mouse showing the deleted region. (C) RT-PCR of total RNA from E11.5 WT (n = 3) and *Ddrgk1*<sup>-/-</sup> (n = 3) limb buds. Values represented as means ± S.E.M (\*\*P < 0.01; two-tailed t-test). (D) Immunoblots of total cell lysates from E11.5 WT (n = 3) and *Ddrgk1*<sup>-/-</sup> (n = 3) limb buds. The immunoblot probing for α-tubulin is also shown in figure 4E. (E) Whole mount preparations of E11.5 WT and *Ddrgk1*<sup>-/-</sup> embryos.

**Figure S3. *DDRGK1* does not affect the translation of *SOX9*.** Even when translation is inhibited, overexpression of *Ddrgk1* increases levels of *SOX9*. 293T cells were transiently transfected with plasmids expressing His-tagged *Ub*, FLAG-tagged *Sox9* and Myc-tagged *Ddrgk1* and 24 hr later the cells were treated with 10 µg/mL of the protein synthesis inhibitor cycloheximide for 6 hr. The immunoblot is representative of two independent experiments with technical replicates.

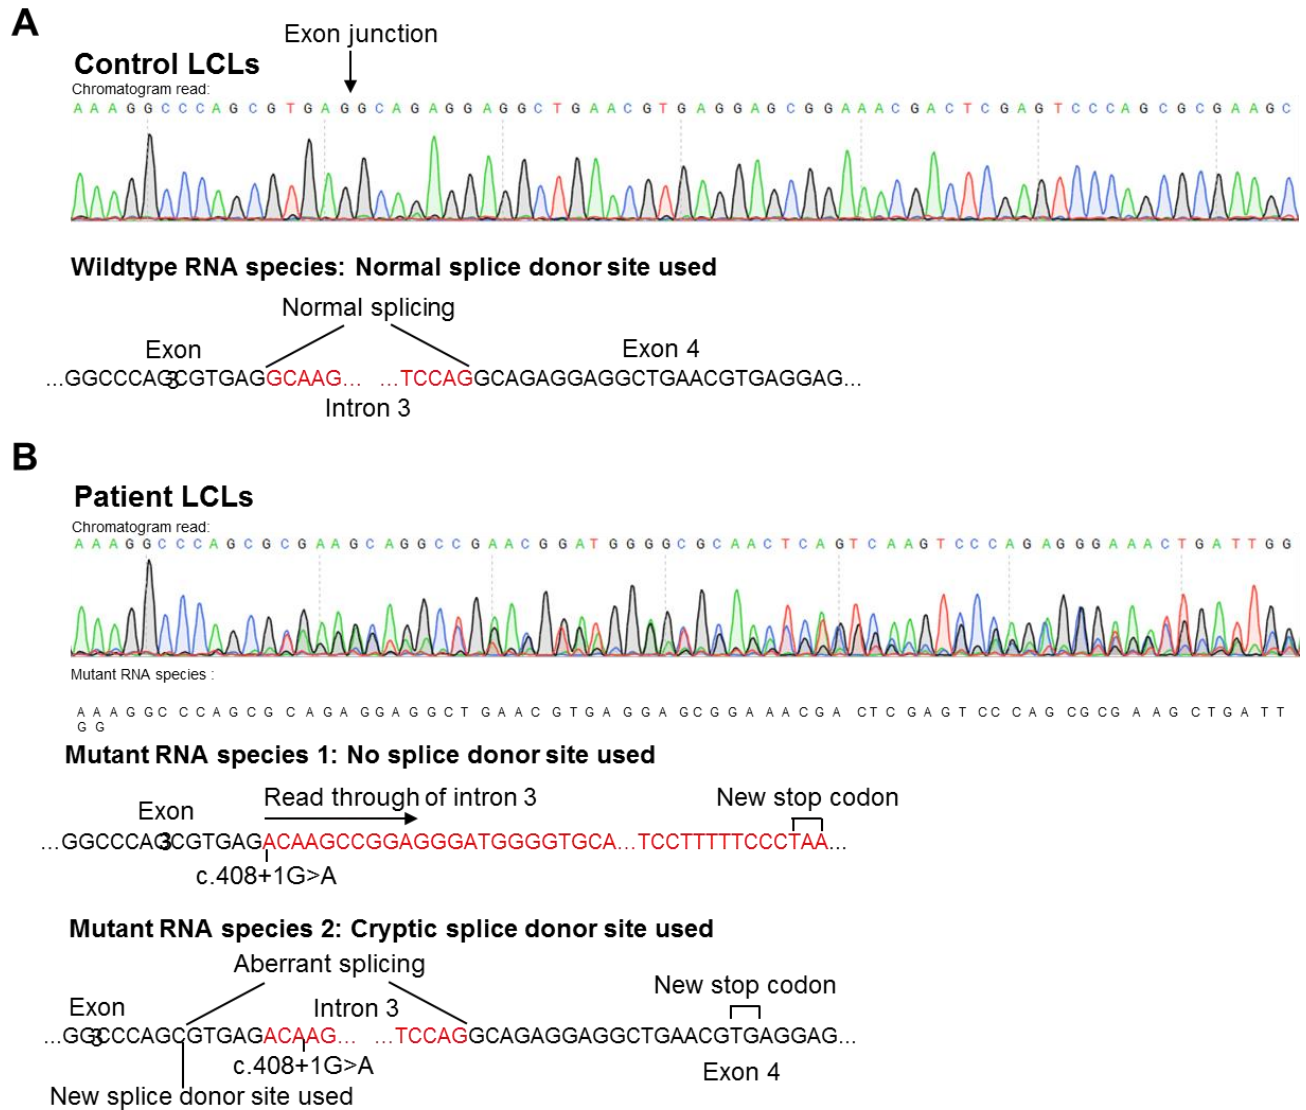

Figure S1

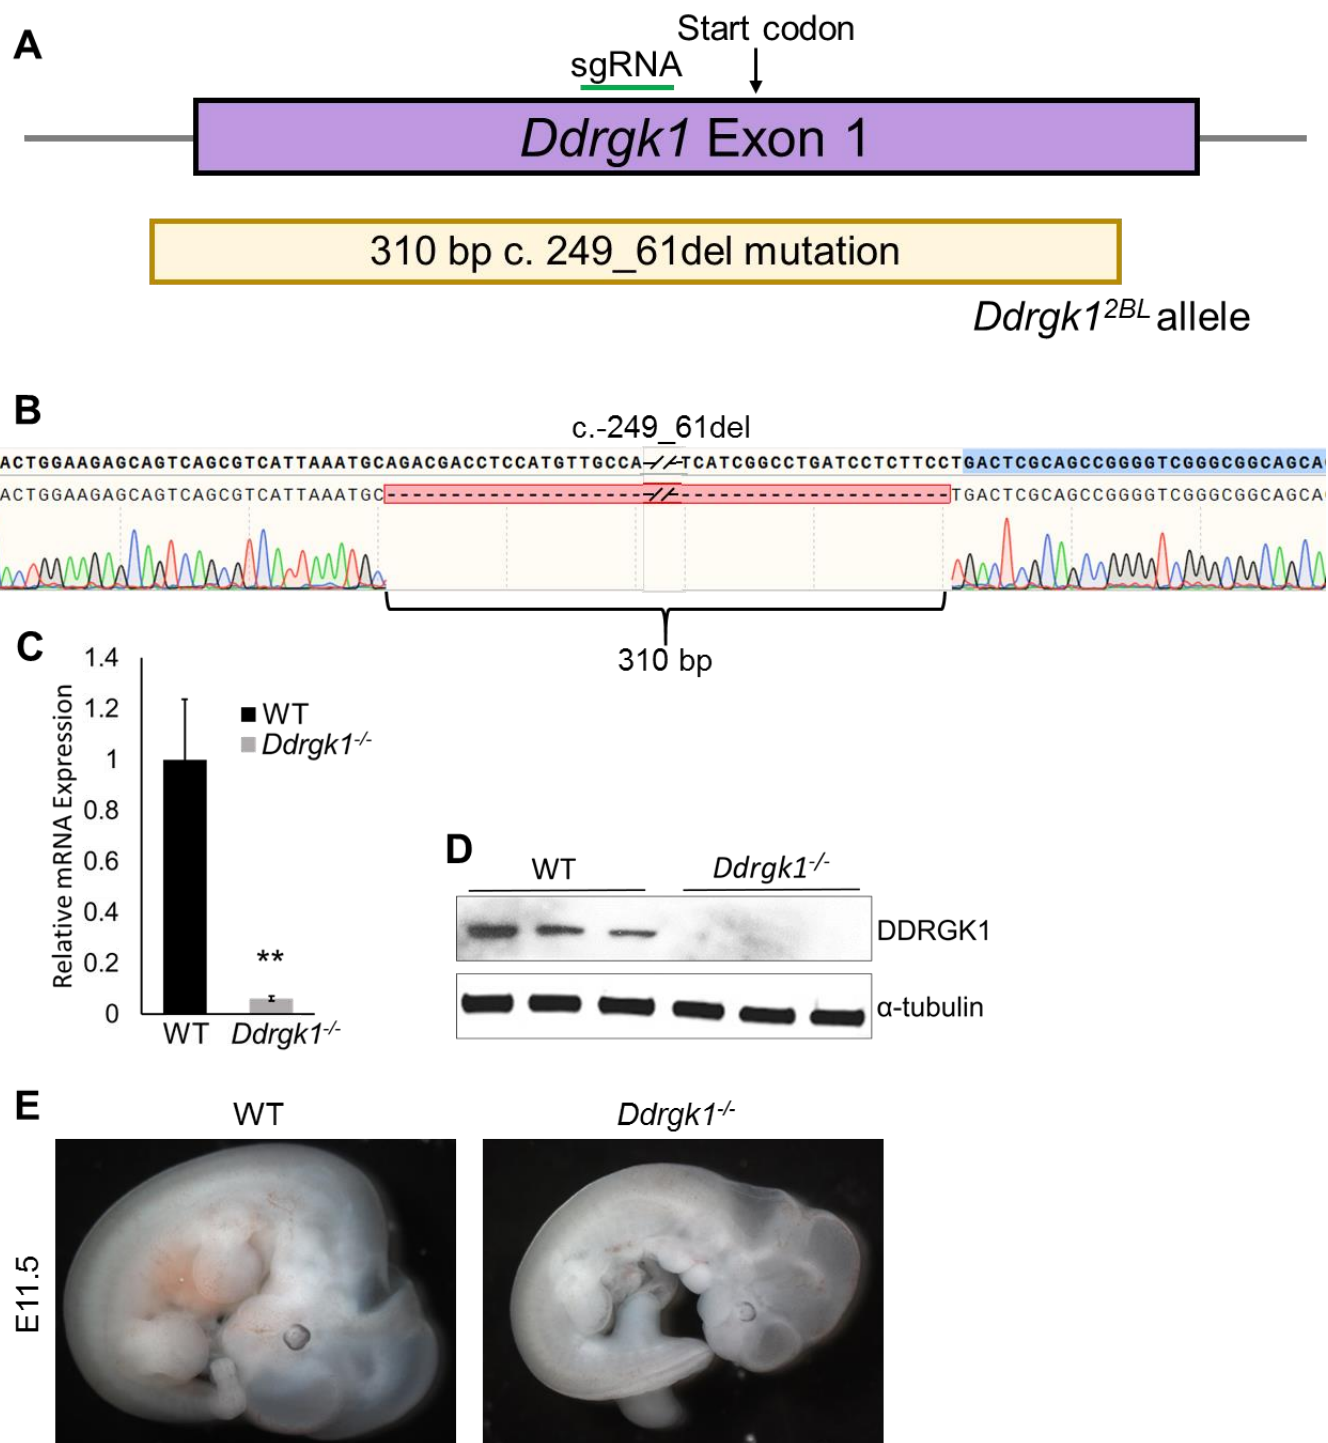

Figure S2

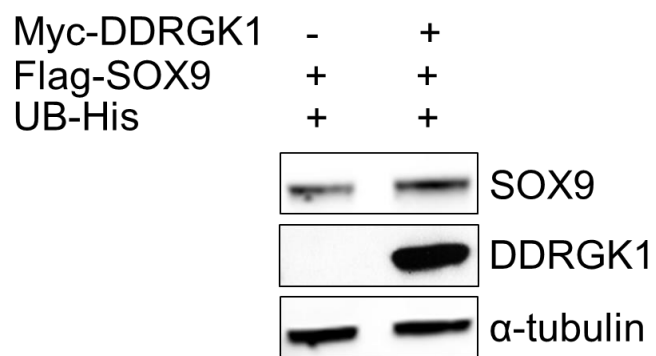

Figure S3
